# Supplementary material for: Structural basis for ligand recognition and signaling of the lysophosphatidylserine receptors GPR34 and GPR174
Source: PubMed Central journal article supplement (PMC10721165; doi:10.1371/journal.pbio.3002387), 2023-12-04

**Figure S2B**

marker  
sample

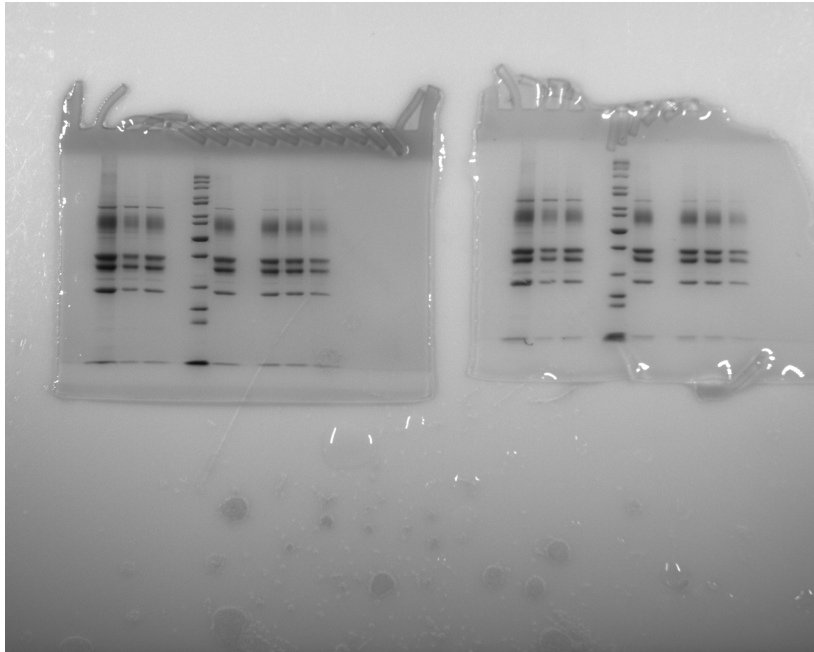

**Figure S3B**

marker  
sample

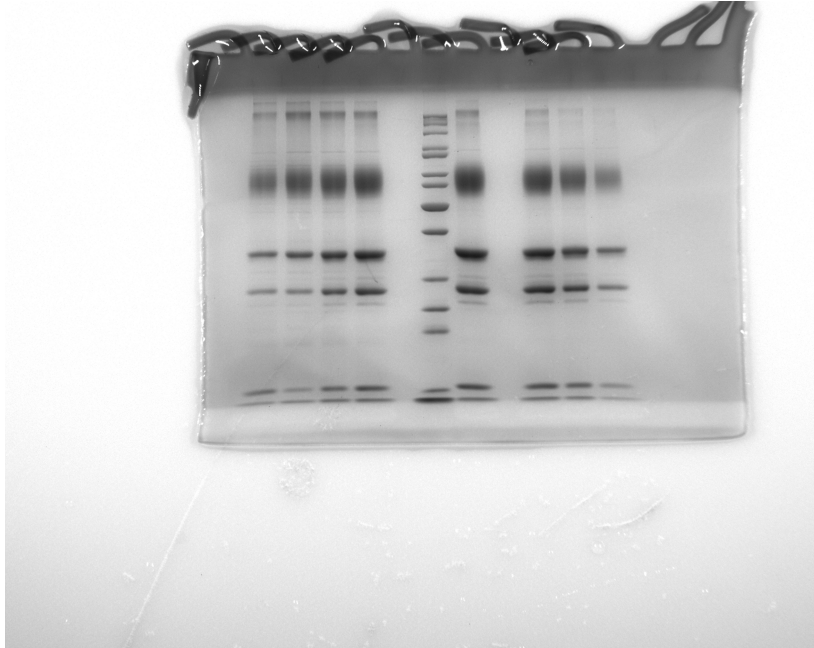

Supplement: pbio.3002387.s009.pdf [file pbio.3002387.s009.pdf]
